# Supplementary figures and images for: Self-assembled charged hydrogels control the alignment of filamentous actin
Source: Royal Society of Chemistry journal article supplement (doi:10.1039/b918304c), 2009-12-22

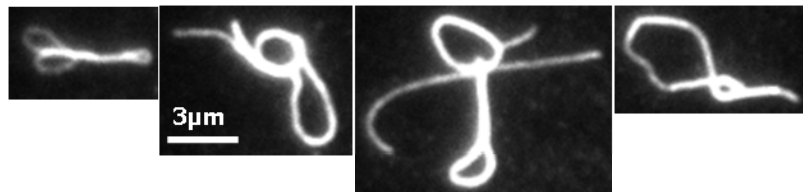

Selected images of F-actin rings for 5% and 20% APTES

Supplement: b918304c.pdf [file b918304c.pdf]
